# Supplementary material for: Spectral tuning of colloidal Si nanocrystal luminescence by post-laser irradiation in liquid
Source: Royal Society of Chemistry journal article supplement (doi:10.1039/d0ra05205a), 2020-01-01
Supplement: d0ra05205a1.pdf [file d0ra05205a1.pdf]

## Supplementary Information

# Spectral Tuning of Colloidal Si Nanocrystal Luminescence by Post-Laser irradiation in Liquid

*Ze Yuan, Toshihiro Nakamura*

† Faculty of Pure and Applied sciences, University of Tsukuba, Tsukuba, Ibaraki 305-  
8573, Japan

‡ Department of Electrical and Electronics Engineering, Hosei University, Tokyo 184-  
8584, Japan

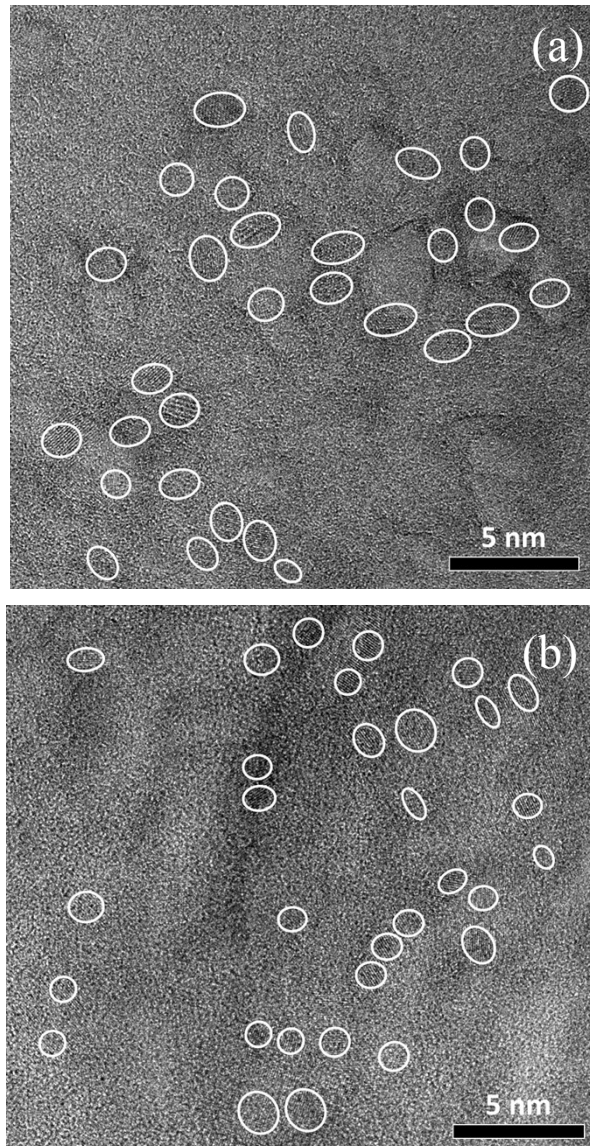

**Supplementary Figure S1** | TEM images of (a) as-prepared and (b) post-irradiated colloidal Si nanocrystals.

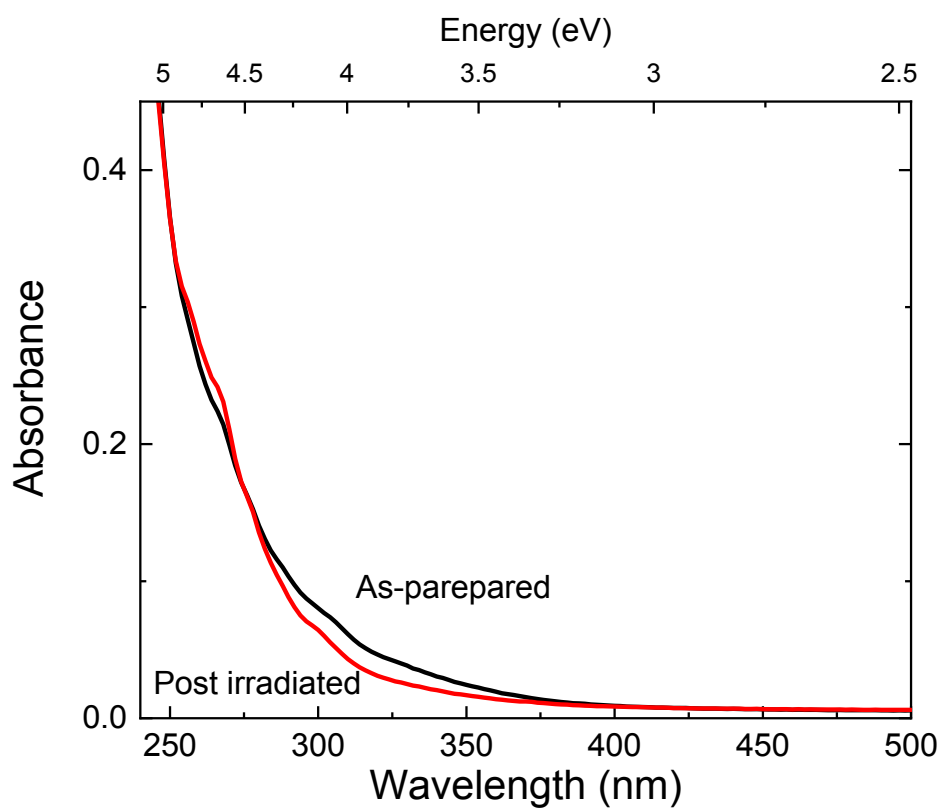

**Supplementary Figure S2** | Absorbance spectra of as-prepared and post-irradiated colloidal Si nanocrystals
